# Supplementary material for: Recent Advances in Chitin Biosynthesis Associated with the Morphology and Secondary Metabolite Synthesis of Filamentous Fungi in Submerged Fermentation
Source: MDPI journal article supplement (doi:10.3390/jof9020205), 2023-02-04
Supplement: s1 [file s1]

Table S1 The statistical data of the members of chitin synthase family in different species

| Organism                                  | T-number | The members of chitin synthase                         |                                 |                                |                                |                            |                                                                |                          |                          | Number of genes |
|-------------------------------------------|----------|--------------------------------------------------------|---------------------------------|--------------------------------|--------------------------------|----------------------------|----------------------------------------------------------------|--------------------------|--------------------------|-----------------|
| Saccharomyces cerevisiae S288c            | T00005   | YBR023C, <i>chs 3</i>                                  | YBR038W, <i>chs 2</i>           | YNL192W, <i>chs 1</i>          | YLR330W, <i>chs 5</i>          | YJL099W, <i>chs 6</i>      | YHR142W, no KO assigned   (RefSeq) <i>chs7</i> ; <i>chs 7p</i> |                          |                          | 6               |
| Lodderomyces elongisporus NRRLYB-4239     | T01116   | LELG_05384, <i>chs 2</i>                               | LELG_05013, <i>chs 1</i>        | LELG_02210, <i>chs 2</i>       | LELG_00298, <i>chs 3</i>       | LELG_00300, <i>chs 3</i>   |                                                                |                          |                          | 5               |
| Candida tropicalis MYA-3404               | T01115   | CAALFM_C113110CA, <i>chs 3</i>                         | CAALF_M_C300710WA, <i>chs 8</i> | CAALFM_C702770WA, <i>chs 1</i> | CAALFM_CR09020CA, <i>chs 2</i> |                            |                                                                |                          |                          | 4               |
| Candida orthopsilosis Co 90-125           | T02488   | CORT_0A01870, <i>chs 3</i>                             | CORT_0D06430, <i>chs 8</i>      | CORT_0G01660, <i>chs 2</i>     | CORT_0H01960, <i>chs 1</i>     | CORT_0H01970, <i>chs 1</i> |                                                                |                          |                          | 5               |
| Sugiyamaella lignohabitans CBS 10342      | T05270   | AWJ20_11, <i>chs 6</i>                                 | AWJ20_12, <i>chs 3</i>          | AWJ20_13, <i>chs 3</i>         | AWJ20_1163, <i>chs 2</i>       | AWJ20_1500, <i>chs 2</i>   | AWJ20_3769, <i>chs 1</i>                                       | AWJ20_4861, <i>chs 3</i> | AWJ20_4948, <i>chs 3</i> | 8               |
| Artibeus jamaicensis                      | T07223   | 1119036436, no KO assigned   (RefSeq) <i>CHS3-like</i> |                                 |                                |                                |                            |                                                                |                          |                          | 1               |
| Xenopus laevis (African clawed frog)      | T01010   | 108717413, <i>chs 2</i>                                | 108716131, <i>chs 2</i>         |                                |                                |                            |                                                                |                          |                          | 2               |
| Xenopus tropicalis (tropical clawed frog) | T01011   | 105947355, <i>chs 2</i> -like isoform X1               |                                 |                                |                                |                            |                                                                |                          |                          | 1               |

|                                                     |        |                                       |                                        |                                                  |                                                  |                                            |                                       |                                         |                                                |                                     |                                            |  |    |
|-----------------------------------------------------|--------|---------------------------------------|----------------------------------------|--------------------------------------------------|--------------------------------------------------|--------------------------------------------|---------------------------------------|-----------------------------------------|------------------------------------------------|-------------------------------------|--------------------------------------------|--|----|
| Danio rerio<br>(zebrafish)                          | T01004 | 101886093,<br><i>chs</i> 2 isoform X1 | 563347, <i>chs</i> 2<br>isoform X1     | 563138,<br><i>chs</i> 2                          | 322468,<br><i>chs</i> 1                          |                                            |                                       |                                         |                                                |                                     |                                            |  | 3  |
| Carassius auratus<br>(goldfish)                     | T07313 | 113057339<br><i>CHS</i> 2-like        | 113061218 <i>CHS</i><br>1-like         | 113061224<br><i>CHS</i> 1-like                   | 113061225<br><i>CHS</i> 1-like                   | 113061526<br><i>CHS</i> 1                  | 113061527<br><i>CHS</i> 1-like        | 113113123<br><i>CHS</i> 2-like          |                                                |                                     |                                            |  | 7  |
| Ictalurus punctatus<br>(channel catfish)            | T04658 | 108260788,<br><i>chs</i> 1            | 108260789, <i>chs</i> 2                | 108260790,<br><i>chs</i> 2                       | 108263942,<br><i>chs</i> 1                       | 124626088,<br><i>chs</i> 1-like            | 124627860,<br><i>chs</i> 1-like       |                                         |                                                |                                     |                                            |  | 6  |
| Pangasianodon<br>hypophthalmus<br>(striped catfish) | T05759 | 113534702,<br><i>chs</i> 2-like       | 113534703, <i>chs</i><br>1-like        | 113544352,<br><i>chs</i> -like                   | 113544353,<br><i>chs</i> 2-like                  | 113544354,<br><i>chs</i> 2-like            |                                       |                                         |                                                |                                     |                                            |  | 5  |
| Silurus<br>meridionalis                             | T08004 | 124381085,<br><i>chs</i> 2-like       | 124381669, <i>chs</i><br>1 isoform X1, | 124381670,<br><i>chs</i> 2-like                  |                                                  |                                            |                                       |                                         |                                                |                                     |                                            |  | 3  |
| Neurospora<br>tetrasperma FGSC<br>2508              | T03451 | NEUTE1DR<br>AFT75235,<br><i>chs</i> 3 | NEUTE1DRAFT<br>127954,<br><i>chs</i> 1 | NEUTE1DR<br>AFT60883,<br>hypothetical<br>protein | NEUTE1D<br>RAFT6088<br>7,<br><i>chs</i> 6        | NEUTE1D<br>RAFT1216<br>15,<br><i>chs</i> D | NEUTE1DRA<br>FT80490,<br><i>chs</i> A | nte:NEUTE1D<br>RAFT72792,<br><i>chs</i> |                                                |                                     |                                            |  | 7  |
| Pyricularia oryzae<br>70-15                         | T01027 | MGG_09962,<br><i>chs</i> 4            | MGG_06064,<br><i>chs</i> D             | MGG_09551,<br><i>chs</i> 3                       | MGG_1301<br>3,<br><i>chs</i> 8                   | MGG_1301<br>4,<br><i>CHS</i> V             | MGG_01802,<br><i>chs</i> 1            | MGG_04145,<br><i>chs</i> 2              |                                                |                                     |                                            |  | 7  |
| Fusarium<br>graminearum                             | T01038 | FGSG_01272<br>,<br><i>chs</i> 4       | FGSG_01949,<br><i>chs</i> D            | fgr:FGSG_12<br>039,<br><i>chs</i> 6              | fgr:FGSG_<br>01964,<br>hypothetical<br>1 protein | fgr:FGSG_<br>02483,<br><i>chs</i> 2        | fgr:FGSG_101<br>16,<br><i>chs</i> 1   | fgr:FGSG_103<br>27,<br><i>chs</i> 3     | fgr:FGSG_106<br>19,<br>hypothetical<br>protein | fgr:FGSG<br>_03418,<br><i>chs</i> 1 | fgr:FGSG_06550,<br>hypothetical<br>protein |  | 10 |

|                                     |        |                                     |                                       |                                         |                                             |                                           |                                    |                                    |                                    |                                      |                               |    |
|-------------------------------------|--------|-------------------------------------|---------------------------------------|-----------------------------------------|---------------------------------------------|-------------------------------------------|------------------------------------|------------------------------------|------------------------------------|--------------------------------------|-------------------------------|----|
| Purpureocillium lilacinum           | T05029 | VFPFJ_0065<br>0,<br><i>chs</i> D    | VFPFJ_00666,<br><i>chs</i> 6          | VFPFJ_0066<br>7,<br><i>chs</i> 6        | VFPFJ_033<br>24,<br><i>chs</i> D            | VFPFJ_044<br>43,<br><i>chs</i> A          | VFPFJ_08553,<br><i>chs</i> G       | VFPFJ_08866,<br><i>chs</i> A       | VFPFJ_11040,<br><i>chs</i>         |                                      |                               | 8  |
| Scedosporium apiospermum IHEM 14462 | T06367 | SAPIO_CDS<br>10594,<br><i>chs</i> 1 | SAPIO_CDS1076<br>0,<br><i>chs</i> 3   | SAPIO_CDS<br>3659,<br><i>chs</i> 4      | SAPIO_CD<br>S3885,<br><i>chs</i> G          | SAPIO_CD<br>S6491,<br><i>chs</i> 1        | SAPIO_CDS70<br>76,<br><i>chs</i> 8 | SAPIO_CDS7<br>077,<br><i>CHS</i> V | SAPIO_CDS9<br>773,<br><i>chs</i> 2 |                                      |                               | 8  |
| pestalotiopsis fici W106-1          | T04924 | PFICI_01118<br>, <i>chs</i> 1       | PFICI_01446,<br><i>chs</i> 4          | PFICI_04362,<br>hypothetical<br>protein | PFICI_043<br>63,<br>hypothetical<br>protein | PFICI_050<br>17,<br><i>chs</i> D          | PFICI_05238,<br><i>chs</i> 2       | PFICI_06085,<br><i>chs</i> 3       | PFICI_07201,<br><i>chs</i> 1       | PFICI_12982,<br>hypothetical protein | PFICI_135<br>13, <i>chs</i> 1 | 10 |
| Botrytis cinerea B05.10             | T01072 | BCIN_01g02<br>520, <i>CHS</i> IIIb  | BCIN_01g03790,<br><i>CHS</i> IV       | BCIN_04g03<br>120, <i>CHS</i> IIIa      | BCIN_07g<br>01300,<br><i>CHS</i> VII        | BCIN_09g0<br>1210,<br><i>CHS</i> I        | BCIN_12g0138<br>0, <i>CHS</i> II   | BCIN_12g053<br>60, <i>CHS</i> VI   | BCIN_12g053<br>70, <i>CHS</i> V    |                                      |                               | 8  |
| Aspergillus fumigatus Af293         | T01017 | AFUA_4G04<br>180, <i>chs</i> B      | AFUA_8G05630,<br><i>chs</i> F         | AFUA_5G00<br>760, <i>chs</i> C          | AFUA_2G<br>01870,<br><i>chs</i> A           | AFUA_1G<br>12600, <i>chs</i><br>D         | AFUA_3G144<br>20, <i>chs</i> G     | AFUA_2G134<br>30, <i>chs</i>       | AFUA_2G134<br>40, <i>chs</i> E     |                                      |                               | 8  |
| Aspergillus clavatus NRRL 1         | T01148 | ACLA_0228<br>60, <i>chs</i> D       | ACLA_041870,<br><i>chs</i> G          | ACLA_09300<br>0, <i>chs</i> A           | ACLA_054<br>220, <i>chs</i> B               | ACLA_072<br>240, <i>chs</i> ,<br>putative | ACLA_072250<br>, <i>chs</i> E      | ACLA_05905<br>0, <i>chs</i> F      |                                    |                                      |                               | 7  |
| Aspergillus fischeri NRRL 181       | T01070 | NFIA_00511<br>0, <i>chs</i>         | NFIA_088620,<br><i>chs</i> , putative | NFIA_08863<br>0, <i>chs</i> E           | NFIA_0983<br>90, <i>chs</i> F               | NFIA_0292<br>10, <i>chs</i> B             | NFIA_062840,<br><i>chs</i> G       | NFIA_012950,<br><i>chs</i> D       | NFIA_034240,<br><i>chs</i> A       | NFIA_041420<br>, <i>chs</i> C        |                               | 9  |
| Aspergillus niger CBS 513.88        | T01030 | ANI_1_3160<br>24, <i>chs</i>        | ANI_1_2332024,<br><i>chs</i>          | ANI_1_1542<br>034, <i>chs</i> C         | ANI_1_684<br>064, <i>chs</i>                | ANI_1_198<br>6074, <i>chs</i> D           | ANI_1_252084<br>, <i>chs</i> D     | ANI_1_49808<br>4, <i>chs</i> B     | ANI_1_12141<br>04, <i>chs</i> C    | ANI_1_12012<br>4, <i>chs</i> A       |                               | 9  |

|                                        |        |                                                  |                                        |            |                                                            |                                                              |                                                            |                                                         |                                                      |                                       |   |
|----------------------------------------|--------|--------------------------------------------------|----------------------------------------|------------|------------------------------------------------------------|--------------------------------------------------------------|------------------------------------------------------------|---------------------------------------------------------|------------------------------------------------------|---------------------------------------|---|
| Aspergillus<br>nidulans FGSC A4        | T01016 | AN1555.2,<br><i>CHS</i> V ( <i>chs</i><br>D)     | AN2523.2,<br>B                         | <i>chs</i> | AN4367.2,<br>hypothetical<br>protein                       | AN4566.2,<br>hypothetica<br>I protein                        | AN6317.2,<br>hypothetica<br>I protein                      | AN6318.2,<br>hypothetical<br>protein                    | AN7032.2,<br>hypothetical<br>protein                 | 7                                     |   |
| Neurospora crassa                      | T01034 | NCU09324,<br><i>chs</i> 4                        | NCU04352,<br>5                         | <i>chs</i> | NCU04350,<br><i>chs</i> 6                                  | NCU05268,<br>, <i>chs</i> 6;                                 | NCU05239,<br><i>chs</i> A                                  | NCU03611,<br><i>chs</i> 1                               | NCU04251,<br><i>chs</i> 3                            | 7                                     |   |
| Neurospora<br>tetrasperma FGSC<br>2508 | T03451 | NEUTE1DR<br>AFT75235,<br><i>chs</i> 3            | NEUTE1DRAFT<br>127954, <i>chs</i> 1    |            | NEUTE1DR<br>AFT60883,<br>hypothetical<br>protein           | NEUTE1D<br>RAFT6088<br>7, <i>chs</i> 6                       | NEUTE1D<br>RAFT1216<br>15, <i>chs</i> D                    | NEUTE1DRA<br>FT80490,<br><i>chs</i> A                   | NEUTE1DRA<br>FT72792,<br><i>chs</i>                  | 7                                     |   |
| Metarhizium<br>acridum CQMa 102        | T03104 | MAC_03818,<br><i>chs</i> 1                       | MAC_07513,<br><i>chs</i> 4             |            | MAC_08014,<br><i>CHS</i> I                                 | MAC_0816<br>7, <i>chs</i> 2                                  | MAC_0862<br>6, <i>chs</i> D                                | MAC_08638,<br><i>CHS</i> III                            | MAC_08639,<br><i>CHS</i> V                           | 7                                     |   |
| Cordyceps militaris<br>CM01            | T03108 | CCM_00447,<br><i>chs</i> A                       | CCM_01980,<br><i>chs</i> 1             |            | CCM_02953,<br><i>chs</i> D                                 | CCM_0296<br>5, <i>chs</i> 6                                  | CCM_0296<br>6, <i>chs</i>                                  | CCM_06973,<br><i>chs</i> 4                              | CCM_08096,<br><i>chs</i>                             | CCM_08511,<br><i>chs</i> 2            | 8 |
| Colletotrichum<br>fiorinae PJ7         | T04796 | CFIO01_120<br>76, <i>chs</i>                     | CFIO01_09839,<br><i>chs</i> 3          |            | CFIO01_127<br>46, <i>CHS</i> VII                           | CFIO01_00<br>474, <i>chs</i>                                 | CFIO01_00<br>475, <i>chs</i>                               | CFIO01_03762<br>, <i>chs</i>                            | CFIO01_1050<br>4, <i>chs</i> 4                       | 7                                     |   |
| Penicillium<br>digitatum Pd1           | T04849 | PDIP_79230,<br><i>chs</i> E                      | PDIP_62350,<br>hypothetical<br>protein |            | PDIP_46630,<br><i>chs</i> G                                | PDIP_2699<br>0, <i>chs</i> D                                 | PDIP_2445<br>0, <i>chs</i> G                               | PDIP_15450,<br><i>chs</i> B                             | PDIP_07640,<br><i>chs</i> A                          | PDIP_03360,<br><i>chs</i> F           | 9 |
| Coccidioides<br>immitis RS             | T01114 | CIMG_05021<br>, <i>CHS</i> V                     | CIMG_05598,<br><i>chs</i> C            |            | CIMG_05647<br>, <i>chs</i> G                               | CIMG_050<br>22, <i>chs</i> 5                                 | CIMG_087<br>66, <i>chs</i> 4                               | CIMG_08655,<br><i>chs</i> 2                             | CIMG_06862,<br><i>CHS</i> VI                         | 8                                     |   |
| Zymoseptoria<br>tritici IPO323         | T02285 | MYCGRDR<br>AFT_51574,<br>hypothetical<br>protein | MYCGRDRAFT_<br>48846, <i>chs</i> 7     |            | MYCGRDR<br>AFT_100232,<br><i>chs</i> 4 ( <i>CHS</i><br>IV) | MYCGRD<br>RAFT_100<br>284, <i>chs</i> 2;<br>( <i>CHS</i> II) | MYCGRD<br>RAFT_108<br>152, <i>chs</i> 5<br>( <i>CHS</i> V) | MYCGRDRAF<br>T_108151,<br><i>chs</i> 6 ( <i>CHS</i> VI) | MYCGRDRA<br>FT_98274,<br><i>chs</i> 1( <i>CHS</i> I) | MYCGRDRA<br>FT_65104,<br><i>chs</i> 3 | 9 |

|                                                             |        |                                                          |                                  |                                     |                                      |                                             |                                                                |                                                             |                                                             |                                                             |                              |    |
|-------------------------------------------------------------|--------|----------------------------------------------------------|----------------------------------|-------------------------------------|--------------------------------------|---------------------------------------------|----------------------------------------------------------------|-------------------------------------------------------------|-------------------------------------------------------------|-------------------------------------------------------------|------------------------------|----|
| Ustilago maydis<br>521                                      | T01021 | UMAG_1011<br>7, <i>chs</i> 4                             | UMAG_10120,<br><i>chs</i> 3      | UMAG_1027<br>7, <i>chs</i> 5        | UMAG_10<br>367, <i>chs</i> 6         | UMAG_03<br>204, <i>chs</i> 8                | UMAG_04290,<br><i>chs</i> 2                                    | UMAG_10718<br>, <i>chs</i> 1                                | UMAG_05480<br>, <i>chs</i> 7                                |                                                             |                              | 9  |
| <b>Trichoderma<br/>reesei QM6a</b>                          | T02991 | TRIREDRAF<br>T_55341, <i>chs</i>                         | TRIREDRAFT_5<br>8188, <i>chs</i> | TRIREDRAF<br>T_12217, <i>chs</i>    | TRIREDR<br>AFT_7156<br>3, <i>chs</i> | TRIREDR<br>AFT_67600<br>, <i>chs</i>        | TRIREDRAFT<br>_51492, <i>chs</i>                               | TRIREDRAF<br>T_112271, <i>chs</i>                           | TRIREDRAF<br>T_124228, <i>chs</i>                           |                                                             |                              | 8  |
| Chaetomium<br>thermophilum var.<br>thermophilum<br>DSM 1495 | T03100 | <b>CTHT_00144</b><br><b>10, no KO</b><br><b>assigned</b> | CTHT_0029870,<br><i>chs</i>      | CTHT_00626<br>40, <i>chs</i>        | CTHT_003<br>0060, <i>chs</i>         | CTHT_003<br>0070, <i>chs</i>                | <b>CTHT_003946</b><br><b>0, hypothetical</b><br><b>protein</b> | CTHT_005166<br>0, <i>chs</i>                                | <b>CTHT_004902</b><br><b>0, no KO</b><br><b>assigned</b>    | CTHT_00597<br>00, no KO<br>assigned                         | CTHT_00597<br>10, <i>chs</i> | 10 |
| Monascus<br>purpureus HQ1                                   |        | TQB77221.1,<br><i>CHS</i> V                              | TQB75461.1,<br><i>CHS</i> III    | TQB73913.1,<br><i>CHS</i> I         | TQB72986.<br>1, <i>CHS</i> VII       | TQB70564.<br>1, <i>CHS</i> II               | TQB69157.1,<br><i>CHS</i> II                                   | <b>TQB73548.1,</b><br><b>hypothetical</b><br><b>protein</b> | <b>TQB73973.1,</b><br><b>hypothetical</b><br><b>protein</b> | <b>TQB73547.1,</b><br><b>hypothetical</b><br><b>protein</b> |                              | 9  |
| Monascus<br>purpureus LQ-6                                  |        | monascus_02<br>563, <i>chs</i> 2                         | monascus_02508,<br><i>chs</i> 3  | monascus_05<br>161,<br><i>chs</i> 4 | monascus_<br>05162,<br><i>chs</i> 6  | monascus_<br>02870, <i>chs</i><br>activator | monascus_027<br>65, <i>chs</i> 5                               | monascus_024<br>00, <i>chs</i> G                            | monascus_043<br>82, <i>chs</i> A                            |                                                             |                              | 8  |
| Monascus<br>purpureus M183                                  |        | g872, <i>chs</i> 2                                       | g920, <i>chs</i> F               | g3077, <i>chs</i> E                 | g3078, <i>chs</i>                    | g2747, <i>chs</i><br>3                      | g5275, <i>chs</i> 3                                            | g4739, <i>chs</i> B                                         | g5640, <i>chs</i> A                                         |                                                             |                              | 8  |
